# Supplementary material for: Computational insights into the photocyclization of diclofenac in solution: effects of halogen and hydrogen bonding
Source: Royal Society of Chemistry journal article supplement (doi:10.1039/c6cp03671f), 2016-01-01
Supplement: c6cp03671f1.pdf [file c6cp03671f1.pdf]

## ***Supplementary Data***

### **Computational Insights into the Photocyclization of Diclofenac in Solution: Effects of Halogen and Hydrogen Bondings**

Abdulilah Dawoud Bani-Yaseen

Department of Chemistry & Earth Sciences, College of Arts & Sciences,  
Qatar University, P.O. Box: 2713, Doha, State of Qatar  
*abdulilah.baniyaseen@qu.edu.qa*

**Table S1.** Calculated geometrical properties of **DCF** obtained at the TD-DFT/B3LYP/6-31G+(d) theoretical level.

| medium      | C2-C3    |         |       |       |       |       |        | C13-H16  |         |        |        |       |       | N10-H11  |         |        |        |        |       |       |       |
|-------------|----------|---------|-------|-------|-------|-------|--------|----------|---------|--------|--------|-------|-------|----------|---------|--------|--------|--------|-------|-------|-------|
|             | B.L. (Å) | Charges |       |       |       |       |        | B.L. (Å) | Charges |        |        |       |       | B.L. (Å) | Charges |        |        |        |       |       |       |
|             |          | C2      |       |       | C3    |       |        |          | C13     |        |        | H16   |       |          | N10     |        |        | H11    |       |       |       |
|             |          | M.Q.    | H.Q.  | NBO   | M.Q.  | H.Q.  | NBO    |          | M.Q.    | H.Q.   | NBO    | M.Q.  | H.Q.  |          | NBO     | M.Q.   | H.Q.   | NBO    | M.Q.  | H.Q.  | NBO   |
| vacuum      | 1.416    | -0.363  | 0.040 | 0.133 | 0.692 | 0.010 | -0.087 | 1.087    | -0.477  | -0.050 | -0.233 | 0.191 | 0.043 | 0.248    | 1.012   | -0.640 | -0.098 | -0.646 | 0.430 | 0.108 | 0.440 |
| water       | 1.416    | -0.411  | 0.037 | 0.129 | 0.699 | 0.008 | -0.090 | 1.087    | -0.397  | -0.054 | -0.246 | 0.208 | 0.048 | 0.256    | 1.012   | -0.538 | -0.097 | -0.646 | 0.454 | 0.117 | 0.450 |
| Ethanol     | 1.416    | -0.453  | 0.038 | 0.130 | 0.717 | 0.008 | -0.091 | 1.087    | -0.393  | -0.054 | -0.244 | 0.207 | 0.048 | 0.255    | 1.013   | -0.535 | -0.097 | -0.646 | 0.453 | 0.116 | 0.450 |
| Isoprop.    | 1.416    | -0.469  | 0.038 | 0.131 | 0.727 | 0.008 | -0.091 | 1.087    | -0.389  | -0.053 | -0.243 | 0.207 | 0.048 | 0.255    | 1.013   | -0.534 | -0.097 | -0.647 | 0.453 | 0.115 | 0.450 |
| DCM         | 1.416    | -0.533  | 0.038 | 0.132 | 0.765 | 0.008 | -0.091 | 1.087    | -0.372  | -0.052 | -0.240 | 0.205 | 0.047 | 0.254    | 1.013   | -0.530 | -0.098 | -0.647 | 0.452 | 0.114 | 0.449 |
| Ethyl. Ac.  | 1.416    | -0.578  | 0.038 | 0.132 | 0.797 | 0.007 | -0.092 | 1.087    | -0.354  | -0.051 | -0.238 | 0.203 | 0.046 | 0.254    | 1.013   | -0.529 | -0.098 | -0.648 | 0.451 | 0.113 | 0.448 |
| 1,4-Dioxane | 1.416    | -0.265  | 0.040 | 0.132 | 0.647 | 0.010 | -0.087 | 1.087    | -0.471  | -0.051 | -0.236 | 0.198 | 0.045 | 0.251    | 1.012   | -0.650 | -0.097 | -0.645 | 0.439 | 0.112 | 0.444 |
| n-Hexane    | 1.416    | -0.284  | 0.040 | 0.132 | 0.656 | 0.010 | -0.087 | 1.087    | -0.471  | -0.051 | -0.236 | 0.197 | 0.044 | 0.251    | 1.012   | -0.648 | -0.097 | -0.646 | 0.437 | 0.111 | 0.444 |

| B.L. (Å) | N10-C12 |        |        |        |       |       | B.L. (Å) | C12-C13 |       |       |        |        |        |
|----------|---------|--------|--------|--------|-------|-------|----------|---------|-------|-------|--------|--------|--------|
|          | Charges |        |        |        |       |       |          | Charges |       |       |        |        |        |
|          | N10     |        |        | C12    |       |       |          | C12     |       |       | C13    |        |        |
|          | M.Q.    | H.Q.   | NBO    | M.Q.   | H.Q.  | NBO   |          | M.Q.    | H.Q.  | NBO   | M.Q.   | H.Q.   | NBO    |
| 1.427    | -0.640  | -0.098 | -0.646 | -0.642 | 0.037 | 0.145 | 1.402    | -0.642  | 0.037 | 0.145 | -0.477 | -0.050 | -0.233 |
| 1.423    | -0.538  | -0.097 | -0.646 | -0.747 | 0.034 | 0.154 | 1.403    | -0.747  | 0.034 | 0.154 | -0.397 | -0.054 | -0.246 |
| 1.424    | -0.535  | -0.097 | -0.646 | -0.750 | 0.034 | 0.154 | 1.403    | -0.750  | 0.034 | 0.154 | -0.393 | -0.054 | -0.244 |
| 1.425    | -0.534  | -0.097 | -0.647 | -0.757 | 0.035 | 0.154 | 1.403    | -0.757  | 0.035 | 0.154 | -0.389 | -0.053 | -0.243 |
| 1.427    | -0.530  | -0.098 | -0.647 | -0.770 | 0.035 | 0.153 | 1.402    | -0.770  | 0.035 | 0.153 | -0.372 | -0.052 | -0.240 |
| 1.428    | -0.529  | -0.098 | -0.648 | -0.779 | 0.036 | 0.152 | 1.402    | -0.779  | 0.036 | 0.152 | -0.354 | -0.051 | -0.238 |
| 1.425    | -0.650  | -0.097 | -0.645 | -0.634 | 0.036 | 0.147 | 1.403    | -0.634  | 0.036 | 0.147 | -0.471 | -0.051 | -0.236 |
| 1.426    | -0.648  | -0.097 | -0.646 | -0.638 | 0.037 | 0.146 | 1.403    | -0.638  | 0.037 | 0.146 | -0.471 | -0.051 | -0.236 |

**Table S2.** Calculated geometrical properties of **DCF<sup>•</sup>** obtained at the TD-DFT/B3LYP/6-31G+(d) theoretical level.

| medium      | C2-C3    |         |       |       |       |        |        | C13-H16  |         |        |        |       |       | N10-H11 |          |         |        |        |       |       |       |
|-------------|----------|---------|-------|-------|-------|--------|--------|----------|---------|--------|--------|-------|-------|---------|----------|---------|--------|--------|-------|-------|-------|
|             | B.L. (Å) | Charges |       |       |       |        |        | B.L. (Å) | Charges |        |        |       |       |         | B.L. (Å) | Charges |        |        |       |       |       |
|             |          | C2      |       |       | C3    |        |        |          | C13     |        |        | H16   |       |         |          | N10     |        |        | H11   |       |       |
|             |          | M.Q.    | H.Q.  | NBO   | M.Q.  | H.Q.   | NBO    |          | M.Q.    | H.Q.   | NBO    | M.Q.  | H.Q.  | NBO     |          | M.Q.    | H.Q.   | NBO    | M.Q.  | H.Q.  | NBO   |
| vacuum      | 1.392    | -0.802  | 0.036 | 0.062 | 1.042 | -0.028 | 0.122  | 1.087    | -0.287  | -0.044 | -0.230 | 0.191 | 0.045 | 0.248   | 1.013    | -0.489  | -0.098 | -0.653 | 0.434 | 0.112 | 0.442 |
| water       | 1.391    | -0.817  | 0.033 | 0.058 | 1.196 | -0.030 | -0.330 | 1.087    | -0.350  | -0.049 | -0.243 | 0.211 | 0.052 | 0.257   | 1.014    | -0.441  | -0.101 | -0.651 | 0.461 | 0.117 | 0.446 |
| Ethanol     | 1.391    | -0.814  | 0.034 | 0.058 | 1.185 | -0.030 | 0.115  | 1.087    | -0.348  | -0.049 | -0.242 | 0.210 | 0.051 | 0.257   | 1.014    | -0.465  | -0.100 | -0.651 | 0.441 | 0.117 | 0.445 |
| Isoprop.    | 1.391    | -0.813  | 0.034 | 0.059 | 1.180 | -0.030 | 0.116  | 1.087    | -0.347  | -0.049 | -0.242 | 0.209 | 0.051 | -0.237  | 1.014    | -0.466  | -0.100 | -0.651 | 0.440 | 0.117 | 0.445 |
| DCM         | 1.391    | -0.810  | 0.044 | 0.059 | 1.160 | -0.029 | 0.116  | 1.087    | -0.341  | -0.052 | -0.241 | 0.207 | 0.057 | 0.255   | 1.014    | -0.466  | -0.129 | -0.651 | 0.439 | 0.130 | 0.445 |
| Ethyl. Ac.  | 1.391    | -0.809  | 0.045 | 0.060 | 1.145 | -0.028 | 0.117  | 1.087    | -0.337  | -0.052 | -0.239 | 0.205 | 0.056 | 0.254   | 1.014    | -0.471  | -0.129 | -0.651 | 0.438 | 0.129 | 0.444 |
| 1,4-Dioxane | 1.391    | -0.813  | 0.045 | 0.061 | 1.098 | -0.027 | 0.120  | 1.087    | -0.318  | -0.051 | -0.235 | 0.198 | 0.054 | 0.251   | 1.014    | -0.480  | -0.128 | -0.651 | 0.435 | 0.127 | 0.443 |
| n-Hexane    | 1.391    | -0.813  | 0.035 | 0.061 | 1.089 | -0.028 | 0.120  | 1.087    | -0.314  | -0.046 | -0.234 | 0.197 | 0.047 | 0.250   | 1.014    | -0.481  | -0.098 | -0.652 | 0.435 | 0.114 | 0.442 |

| N10-C12  |         |        |        |        |       |       | C12-C13  |         |       |       |        |        |        |
|----------|---------|--------|--------|--------|-------|-------|----------|---------|-------|-------|--------|--------|--------|
| B.L. (Å) | Charges |        |        |        |       |       | B.L. (Å) | Charges |       |       |        |        |        |
|          | N10     |        |        | C12    |       |       |          | C12     |       |       | C13    |        |        |
|          | M.Q.    | H.Q.   | NBO    | M.Q.   | H.Q.  | NBO   |          | M.Q.    | H.Q.  | NBO   | M.Q.   | H.Q.   | NBO    |
| 1.432    | -0.489  | -0.098 | -0.653 | -0.228 | 0.040 | 0.147 | 1.398    | -0.228  | 0.040 | 0.147 | -0.287 | -0.044 | -0.230 |
| 1.432    | -0.441  | -0.101 | -0.651 | -0.401 | 0.034 | 0.143 | 1.400    | -0.401  | 0.034 | 0.143 | -0.350 | -0.049 | -0.243 |
| 1.432    | -0.465  | -0.100 | -0.651 | -0.396 | 0.034 | 0.143 | 1.400    | -0.396  | 0.034 | 0.143 | -0.348 | -0.049 | -0.242 |
| 1.432    | -0.394  | -0.100 | -0.651 | -0.394 | 0.034 | 0.144 | 1.400    | -0.394  | 0.034 | 0.144 | -0.347 | -0.049 | -0.242 |
| 1.432    | -0.466  | -0.129 | -0.651 | -0.385 | 0.042 | 0.144 | 1.400    | -0.385  | 0.042 | 0.144 | -0.341 | -0.052 | -0.241 |
| 1.432    | -0.471  | -0.129 | -0.651 | -0.378 | 0.043 | 0.144 | 1.400    | -0.378  | 0.043 | 0.144 | -0.337 | -0.052 | -0.239 |
| 1.432    | -0.480  | -0.128 | -0.651 | -0.348 | 0.045 | 0.146 | 1.399    | -0.348  | 0.045 | 0.146 | -0.318 | -0.051 | -0.235 |
| 1.432    | -0.481  | -0.098 | -0.652 | -0.343 | 0.038 | 0.146 | 1.400    | -0.343  | 0.038 | 0.146 | -0.314 | -0.046 | -0.234 |

**Table S3.** Calculated geometrical properties of CCA obtained at the TD-DFT/B3LYP/6-31G+(d) theoretical level.

| medium      | C2-C3    |         |       |       |       |        |        | C13-H16  |         |        |        |      |      | N10-H11 |          |         |        |        |       |       |       |
|-------------|----------|---------|-------|-------|-------|--------|--------|----------|---------|--------|--------|------|------|---------|----------|---------|--------|--------|-------|-------|-------|
|             | B.L. (Å) | Charges |       |       |       |        |        | B.L. (Å) | Charges |        |        |      |      |         | B.L. (Å) | Charges |        |        |       |       |       |
|             |          | C2      |       |       | C3    |        |        |          | C13     |        |        | H16  |      |         |          | N10     |        |        | H11   |       |       |
|             |          | M.Q.    | H.Q.  | NBO   | M.Q.  | H.Q.   | NBO    |          | M.Q.    | H.Q.   | NBO    | M.Q. | H.Q. | NBO     |          | M.Q.    | H.Q.   | NBO    | M.Q.  | H.Q.  | NBO   |
| vacuum      | 1.421    | -0.684  | 0.032 | 0.137 | 1.052 | -0.022 | -0.060 | ---      | 1.168   | -0.024 | -0.094 | ---  | ---  | ---     | 1.015    | -0.454  | -0.072 | -0.563 | 0.457 | 0.111 | 0.467 |
| water       | 1.423    | -0.612  | 0.028 | 0.133 | 1.002 | -0.027 | -0.064 | ---      | 1.122   | -0.030 | -0.102 | ---  | ---  | ---     | 1.015    | -0.458  | -0.073 | -0.563 | 0.458 | 0.112 | 0.468 |
| Ethanol     | 1.423    | -0.616  | 0.028 | 0.133 | 1.005 | -0.027 | -0.064 | ---      | 1.125   | -0.030 | -0.101 | ---  | ---  | ---     | 1.015    | -0.458  | -0.073 | -0.563 | 0.458 | 0.112 | 0.468 |
| Isoprop.    | 1.423    | -0.618  | 0.028 | 0.133 | 1.007 | -0.026 | -0.064 | ---      | 1.126   | -0.030 | -0.101 | ---  | ---  | ---     | 1.015    | -0.458  | -0.073 | -0.563 | 0.458 | 0.112 | 0.468 |
| DCM         | 1.423    | -0.625  | 0.029 | 0.133 | 1.013 | -0.026 | -0.063 | ---      | 1.131   | -0.029 | -0.100 | ---  | ---  | ---     | 1.015    | -0.457  | -0.073 | -0.563 | 0.458 | 0.112 | 0.468 |
| Ethyl. Ac.  | 1.422    | -0.631  | 0.029 | 0.134 | 1.017 | -0.025 | -0.063 | ---      | 1.135   | -0.029 | -0.100 | ---  | ---  | ---     | 1.015    | -0.457  | -0.073 | -0.563 | 0.458 | 0.112 | 0.468 |
| 1,4-Dioxane | 1.422    | -0.656  | 0.031 | 0.135 | 1.035 | -0.024 | -0.062 | ---      | 1.152   | -0.026 | -0.097 | ---  | ---  | ---     | 1.015    | -0.455  | -0.073 | -0.563 | 0.457 | 0.111 | 0.467 |
| n-Hexane    | 1.422    | -0.661  | 0.031 | 0.136 | 1.038 | -0.024 | -0.061 | ---      | 1.155   | -0.026 | -0.096 | ---  | ---  | ---     | 1.015    | -0.455  | -0.072 | -0.563 | 0.457 | 0.111 | 0.467 |

| N10-C12  |         |        |        |        |       |       | C12-C13  |         |       |       |       |        |        |
|----------|---------|--------|--------|--------|-------|-------|----------|---------|-------|-------|-------|--------|--------|
| B.L. (Å) | Charges |        |        |        |       |       | B.L. (Å) | Charges |       |       |       |        |        |
|          | N10     |        |        | C12    |       |       |          | C12     |       |       | C13   |        |        |
|          | M.Q.    | H.Q.   | NBO    | M.Q.   | H.Q.  | NBO   |          | M.Q.    | H.Q.  | NBO   | M.Q.  | H.Q.   | NBO    |
| 1.388    | -0.454  | -0.072 | -0.563 | -0.309 | 0.037 | 0.189 | 1.421    | -0.309  | 0.037 | 0.189 | 1.168 | -0.024 | -0.094 |
| 1.389    | -0.458  | -0.073 | -0.563 | -0.263 | 0.034 | 0.185 | 1.421    | -0.263  | 0.034 | 0.185 | 1.122 | -0.030 | -0.102 |
| 1.389    | -0.458  | -0.073 | -0.563 | -0.266 | 0.034 | 0.186 | 1.421    | -0.266  | 0.034 | 0.186 | 1.125 | -0.030 | -0.101 |
| 1.388    | -0.458  | -0.073 | -0.563 | -0.267 | 0.034 | 0.186 | 1.421    | -0.267  | 0.034 | 0.186 | 1.126 | -0.030 | -0.101 |
| 1.389    | -0.457  | -0.073 | -0.563 | -0.272 | 0.034 | 0.186 | 1.421    | -0.272  | 0.034 | 0.186 | 1.131 | -0.029 | -0.100 |
| 1.389    | -0.457  | -0.073 | -0.563 | -0.275 | 0.035 | 0.187 | 1.421    | -0.275  | 0.035 | 0.187 | 1.135 | -0.029 | -0.100 |
| 1.389    | -0.455  | -0.073 | -0.563 | -0.292 | 0.036 | 0.188 | 1.421    | -0.292  | 0.036 | 0.188 | 1.152 | -0.026 | -0.097 |
| 1.389    | -0.455  | -0.072 | -0.563 | -0.295 | 0.036 | 0.188 | 1.421    | -0.295  | 0.036 | 0.188 | 1.155 | -0.026 | -0.096 |

**Table S4.** Calculated geometrical properties of CCA • obtained at the TD-DFT/B3LYP/6-31G+(d) theoretical level.

| medium      | C2-C3    |         |       |       |       |        |        | C13-H16  |         |        |        |      |      | N10-H11 |          |         |        |        |       |       |       |
|-------------|----------|---------|-------|-------|-------|--------|--------|----------|---------|--------|--------|------|------|---------|----------|---------|--------|--------|-------|-------|-------|
|             | B.L. (Å) | Charges |       |       |       |        |        | B.L. (Å) | Charges |        |        |      |      |         | B.L. (Å) | Charges |        |        |       |       |       |
|             |          | C2      |       |       | C3    |        |        |          | C13     |        |        | H16  |      |         |          | N10     |        |        | H11   |       |       |
|             |          | M.Q.    | H.Q.  | NBO   | M.Q.  | H.Q.   | NBO    |          | M.Q.    | H.Q.   | NBO    | M.Q. | H.Q. | NBO     |          | M.Q.    | H.Q.   | NBO    | M.Q.  | H.Q.  | NBO   |
| vacuum      | 1.409    | -0.890  | 0.045 | 0.144 | 0.745 | -0.012 | -0.035 | ---      | -0.198  | -0.016 | -0.330 | ---  | ---  | ---     | 1.019    | -0.440  | 0.117  | -0.586 | 0.460 | 0.117 | 0.466 |
| water       | 1.410    | -0.798  | 0.041 | 0.141 | 0.721 | -0.013 | -0.036 | ---      | -0.137  | -0.016 | -0.333 | ---  | ---  | ---     | 1.018    | -0.445  | -0.109 | -0.590 | 0.459 | 0.116 | 0.464 |
| Ethanol     | 1.410    | -0.805  | 0.041 | 0.142 | 0.723 | -0.013 | -0.036 | ---      | -0.141  | -0.016 | -0.333 | ---  | ---  | ---     | 1.018    | -0.445  | -0.108 | -0.590 | 0.459 | 0.116 | 0.464 |
| Isoprop.    | 1.410    | -0.807  | 0.042 | 0.142 | 0.724 | -0.013 | -0.036 | ---      | -0.142  | -0.016 | -0.333 | ---  | ---  | ---     | 1.018    | -0.445  | -0.108 | -0.589 | 0.459 | 0.116 | 0.464 |
| DCM         | 1.410    | -0.819  | 0.030 | 0.142 | 0.726 | -0.013 | -0.036 | ---      | -0.149  | -0.015 | -0.333 | ---  | ---  | ---     | 1.018    | -0.444  | -0.080 | -0.589 | 0.459 | 0.106 | 0.465 |
| Ethyl. Ac.  | 1.410    | -0.828  | 0.042 | 0.142 | 0.730 | -0.013 | -0.035 | ---      | -0.156  | -0.016 | -0.333 | ---  | ---  | ---     | 1.018    | -0.444  | -0.108 | -0.589 | 0.459 | 0.116 | 0.465 |
| 1,4-Dioxane | 1.410    | -0.860  | 0.032 | 0.144 | 0.738 | -0.013 | -0.035 | ---      | -0.178  | -0.015 | -0.333 | ---  | ---  | ---     | 1.019    | -0.442  | -0.078 | -0.587 | 0.460 | 0.107 | 0.465 |
| n-Hexane    | 1.410    | -0.866  | 0.044 | 0.144 | 0.740 | -0.012 | -0.035 | ---      | -0.182  | -0.016 | 0.331  | ---  | ---  | ---     | 1.019    | -0.442  | -0.106 | -0.587 | 0.460 | 0.117 | 0.465 |

| N10-C12  |         |        |        |       |       |       | C12-C13  |         |       |       |        |        |        |
|----------|---------|--------|--------|-------|-------|-------|----------|---------|-------|-------|--------|--------|--------|
| B.L. (Å) | Charges |        |        |       |       |       | B.L. (Å) | Charges |       |       |        |        |        |
|          | N10     |        |        | C12   |       |       |          | C12     |       |       | C13    |        |        |
|          | M.Q.    | H.Q.   | NBO    | M.Q.  | H.Q.  | NBO   |          | M.Q.    | H.Q.  | NBO   | M.Q.   | H.Q.   | NBO    |
| 1.386    | -0.440  | 0.117  | -0.586 | 0.790 | 0.057 | 0.234 | 1.516    | 0.790   | 0.057 | 0.234 | -0.198 | -0.016 | -0.330 |
| 1.388    | -0.445  | -0.109 | -0.590 | 0.766 | 0.055 | 0.233 | 1.515    | 0.766   | 0.055 | 0.233 | -0.137 | -0.016 | -0.333 |
| 1.388    | -0.445  | -0.108 | -0.590 | 0.768 | 0.055 | 0.234 | 1.515    | 0.768   | 0.055 | 0.234 | -0.141 | -0.016 | -0.333 |
| 1.388    | -0.445  | -0.108 | -0.589 | 0.769 | 0.055 | 0.234 | 1.515    | 0.769   | 0.055 | 0.234 | -0.142 | -0.016 | -0.333 |
| 1.388    | -0.444  | -0.080 | -0.589 | 0.772 | 0.047 | 0.234 | 1.515    | 0.772   | 0.047 | 0.234 | -0.149 | -0.015 | -0.333 |
| 1.387    | -0.444  | -0.108 | -0.589 | 0.774 | 0.055 | 0.234 | 1.515    | 0.774   | 0.055 | 0.234 | -0.156 | -0.016 | -0.333 |
| 1.387    | -0.442  | -0.078 | -0.587 | 0.783 | 0.048 | 0.234 | 1.515    | 0.783   | 0.048 | 0.234 | -0.178 | -0.015 | -0.333 |
| 1.386    | -0.442  | -0.106 | -0.587 | 0.785 | 0.056 | 0.234 | 1.515    | 0.785   | 0.056 | 0.234 | -0.182 | -0.016 | 0.331  |

**Table S5.** Calculated charges of **DCF •** as complexed with water molecule(s) obtained at the TD-DFT/B3LYP/6-31G+(d) theoretical level.

| Atom | A       |         |            |         | B       |         |            |         | AB      |         |            |         |
|------|---------|---------|------------|---------|---------|---------|------------|---------|---------|---------|------------|---------|
|      | ESM     |         | ESM+IEFPCM |         | ESM     |         | ESM+IEFPCM |         | ESM     |         | ESM+IEFPCM |         |
|      | M.Q.    | H.Q.    | M.Q.       | H.Q.    | M.Q.    | H.Q.    | M.Q.       | H.Q.    | M.Q.    | H.Q.    | M.Q.       | H.Q.    |
| C2   | -0.0910 | 0.0388  | -0.1300    | 0.0385  | -1.7380 | 0.0512  | -1.5720    | 0.0479  | -0.6890 | 0.0429  | -0.8680    | 0.0415  |
| C3   | 0.1010  | -0.0257 | 0.2330     | -0.0217 | 0.8420  | -0.0308 | 0.8550     | -0.0399 | 0.9530  | -0.0288 | 0.8410     | -0.0277 |
| C12  | -0.5680 | 0.0447  | -0.2980    | 0.0410  | -0.2590 | 0.0564  | -0.2290    | 0.0473  | -0.7710 | 0.0471  | -0.7620    | 0.0409  |
| C13  | 0.5690  | -0.0532 | 0.5360     | -0.0574 | 0.5980  | -0.0505 | 0.4190     | -0.0545 | 0.7730  | -0.0468 | 0.6240     | -0.0477 |
| N10  | -0.4320 | -0.0872 | -0.4340    | -0.0871 | -0.4670 | -0.1310 | -0.5150    | -0.1352 | -0.4100 | -0.0988 | -0.4630    | -0.1011 |
| H11  | 0.4700  | 0.0912  | 0.4680     | 0.0883  | 0.5450  | 0.0947  | 0.5340     | 0.0906  | 0.5530  | 0.0854  | 0.5410     | 0.0813  |
| H16  | 0.2030  | 0.0401  | 0.2130     | 0.0406  | 0.1910  | 0.0505  | 0.2040     | 0.0539  | 0.1930  | 0.0453  | 0.2100     | 0.0488  |
| O26  | -0.4320 | -0.2617 | -0.4790    | -0.2874 | -0.4740 | -0.2552 | -0.5040    | -0.2694 | -0.4720 | -0.2462 | -0.5000    | -0.2594 |
